# Supplementary material for: Three-dimensional hierarchical self-supported multi-walled carbon nanotubes/tin(iv) disulfide nanosheets heterostructure electrodes for high power Li ion batteries
Source: Royal Society of Chemistry journal article supplement (doi:10.1039/c2jm16248b), 2012-01-01
Supplement: c2jm16248b.pdf [file c2jm16248b.pdf]

# Electronic Supplementary Information

## Three-dimensional Hierarchical Self-supported Multi-walled Carbon Nanotubes/Tin (IV) Disulfide Nanosheets Heterostructure Electrodes for High Power Li ion Batteries

Jin-Gu Kang,<sup>a</sup> Gwang-Hee Lee,<sup>a,b</sup> Kyung-Soo Park,<sup>a,b</sup> Sang-Ok Kim,<sup>c</sup> Sungjun Lee,<sup>d</sup> Dong-Wan Kim,<sup>\*b</sup> and Jae-Gwan Park<sup>\*a</sup>

<sup>a</sup>*Nanophotonics Research Center, Korea Institute of Science and Technology, Seoul 136-791, Korea. E-mail: [jgpark@kist.re.kr](mailto:jgpark@kist.re.kr).*

<sup>b</sup>*Department of Materials Science and Engineering, Ajou University, Suwon 443-749, Korea. E-mail: [dwkim@ajou.ac.kr](mailto:dwkim@ajou.ac.kr).*

<sup>c</sup>*Energy Storage Research Center, Korea Institute of Science and Technology, Seoul 136-791, Korea.*

<sup>d</sup>*Division of Physical Metrology, Korea Research Institute of Standards and Science, Daejeon, 305-600, Korea*

[\*] To whom correspondence should be addressed. E-mail: [dwkim@ajou.ac.kr](mailto:dwkim@ajou.ac.kr), [jgpark@kist.re.kr](mailto:jgpark@kist.re.kr)

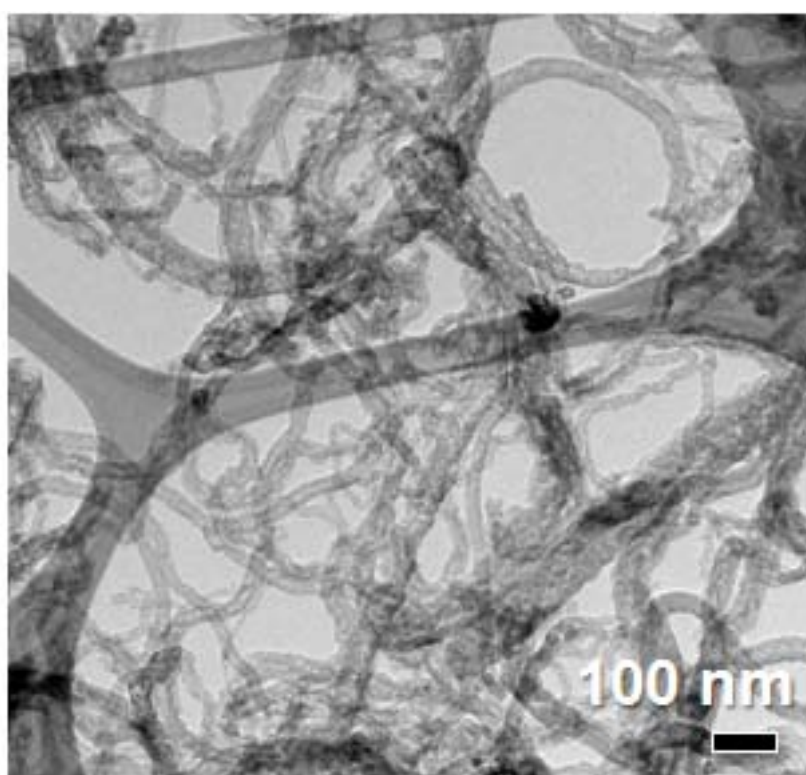

**Figure S1.** Low-magnification TEM image of the MWCNT.

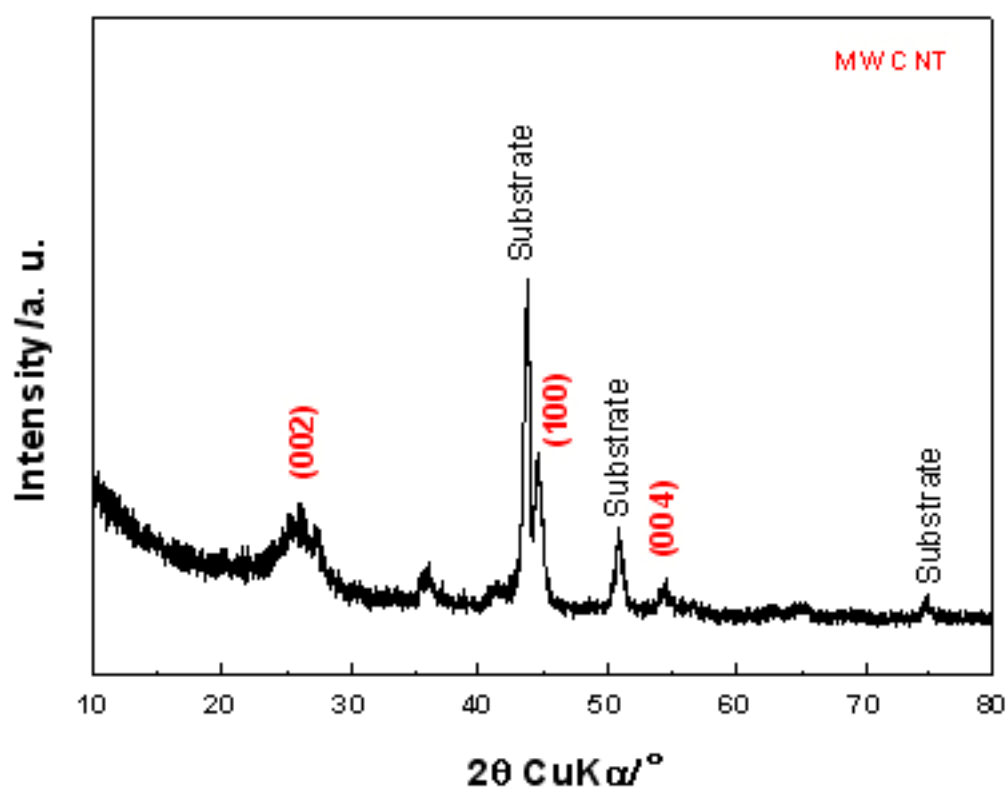

**Figure S2.** XRD pattern of the self-supported MWCNT directly synthesized on the SS substrate.

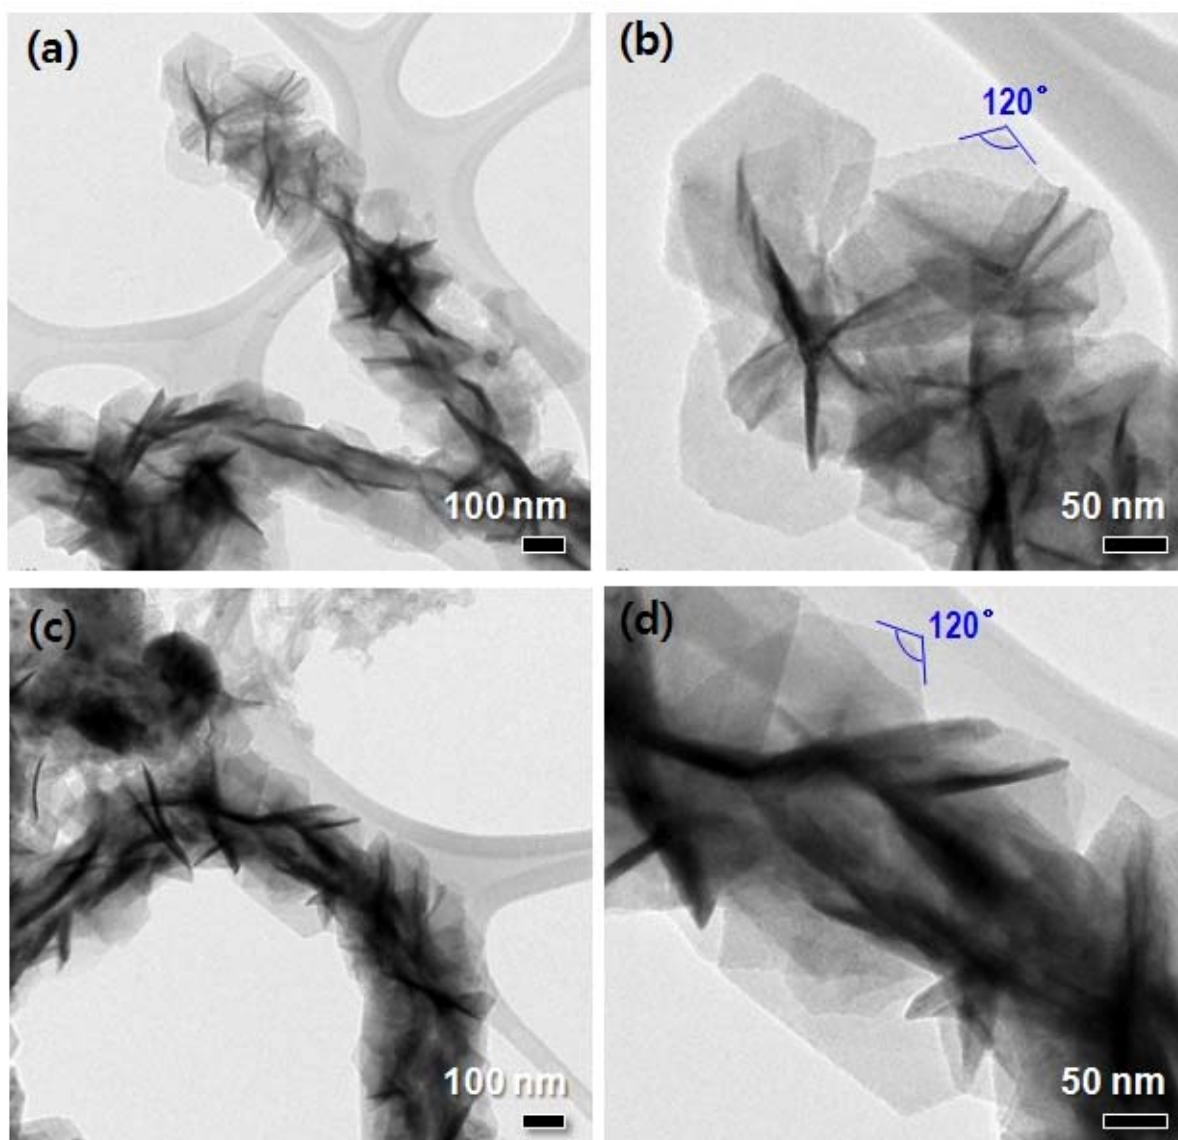

**Figure S3.** (a, c) Low-magnification and (b, d) high-magnification TEM images of the MWCNT/SnS<sub>2</sub> heterostructures.

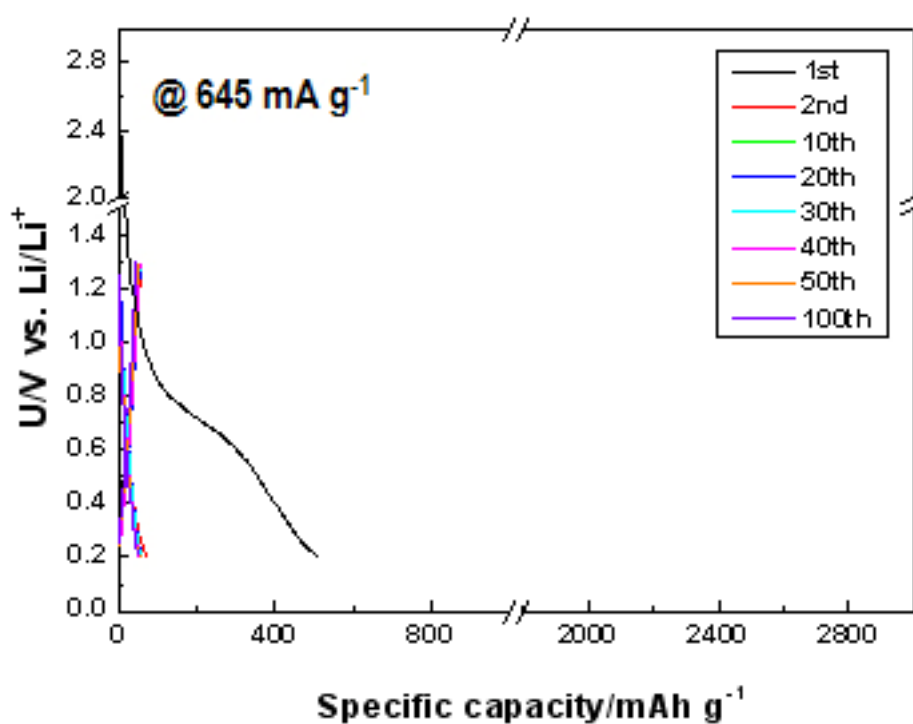

**Figure S4.** Galvanostatic voltage profiles against specific capacity of the self-supported MWCNT electrodes over 0.2 ~ 1.3 V during 100 cycles at a current density of 645 mA g<sup>-1</sup>.
